# Supplementary material for: Glutamine uptake and utilization of human mesenchymal glioblastoma in orthotopic mouse model
Source: PubMed Central journal article supplement (PMC7416393; doi:10.1186/s40170-020-00215-8), 2020-08-10
Supplement: 40170_2020_215_MOESM1_ESM.pdf [file 40170_2020_215_MOESM1_ESM.pdf]

|           | M1        | M2        | CNP1      | CNP2      |
|-----------|-----------|-----------|-----------|-----------|
| TP53      | present   | present   | present   | present   |
| EGFR      | normal    | normal    | amplified | normal    |
| PDGFR     | normal    | normal    | amplified | normal    |
| PTEN      | present   | present   | present   | present   |
| INK4a/ARF | deleted   | deleted   | deleted   | deleted   |
| IDH1      | wild-type | wild-type | wild-type | wild-type |
| MGMT      | absent    | absent    | absent    | absent    |

Supplementary Table 1 Genomic alterations of primary cultures  
Major genomic alterations reported in GBM analyzed using RNA sequencing analysis are presented for each primary cultures.

## G6P-F6P

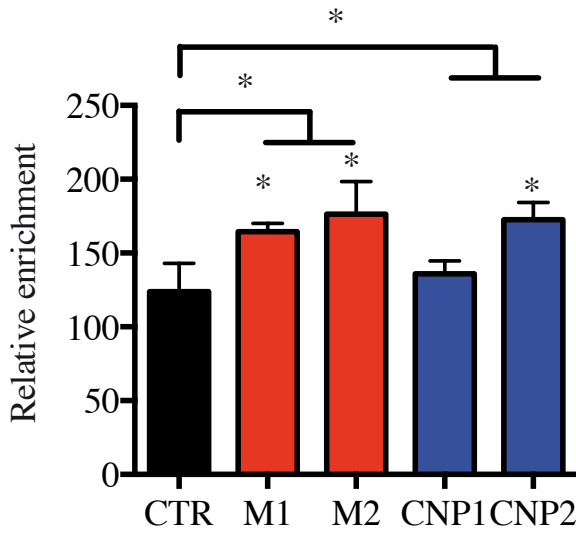

## Ribose 5P

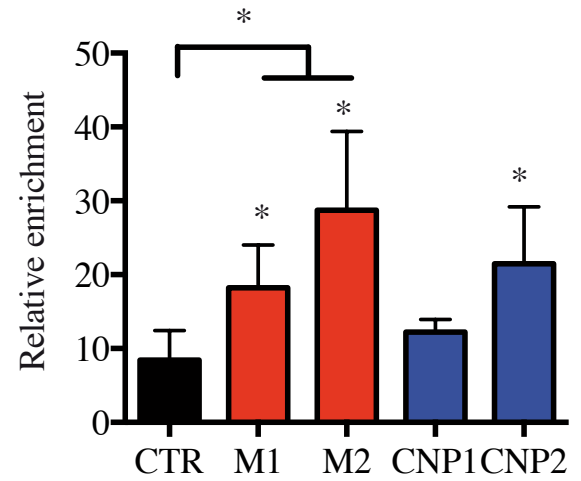

Supplementary Figure S1. Metabolic profile of Glucose6P-Fructose6P and Ribose5P in human orthotopic tumors (HOT) and control brain.

Abundance of Glucose6P-Fructose6P (G6P-F6P) from 3 independent samples for CTR brain and each tumor subtype was analyzed by LCMS. Results are presented as mean $\pm$ sem. Results are compared to CTR brain and between groups using multiple t-test analysis (\*  $p < 0.05$ ).

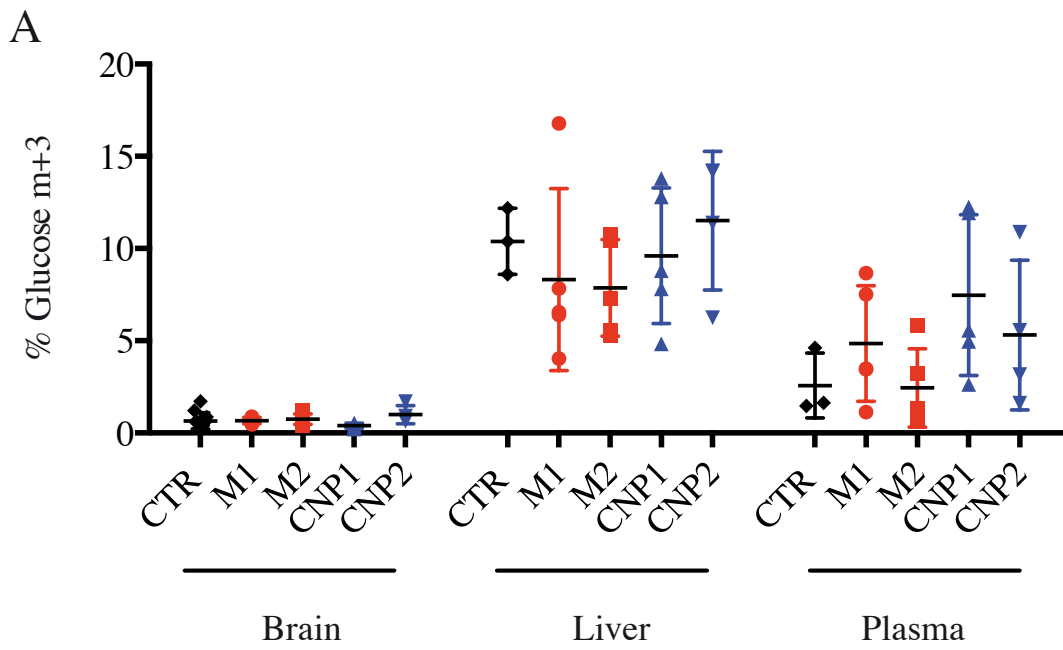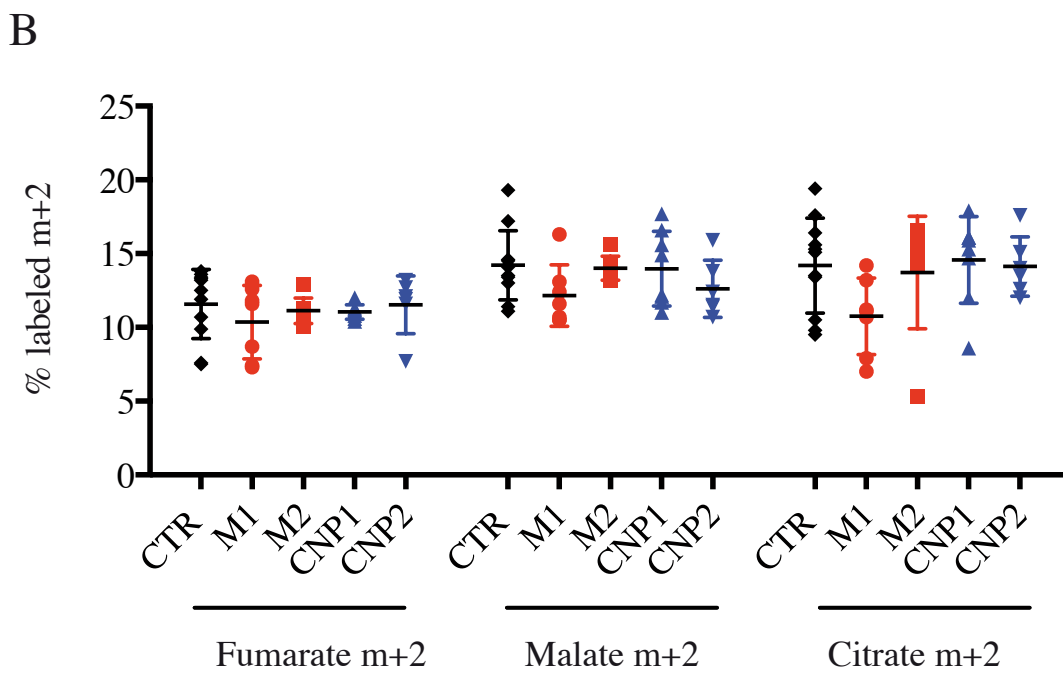

Supplementary Figure S2 Mass spectrometry analysis of labeled  $^{13}\text{C}$  Glucose in CTR mice and tumor-bearing mice.

A. Labeled  $^{13}\text{C}$ -Glucose (m+3) in brain, liver and plasma. B. Labeled  $^{13}\text{C}$ -TCA metabolites from  $^{13}\text{C}$ -Glucose (m+3) in the brain of CTR mice, mesenchymal-tumor bearing mice and CNP-tumor bearing mice.
